# Supplementary material
Source: PubMed Central journal article supplement (PMC2268594)

**A**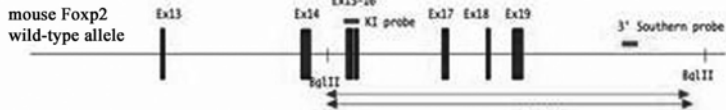

*Foxp2* knock-in  
targeting vector

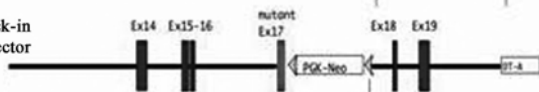

Homologous recombination  
in ES cells

**B**

mouse *Foxp2*  
recombinant allele

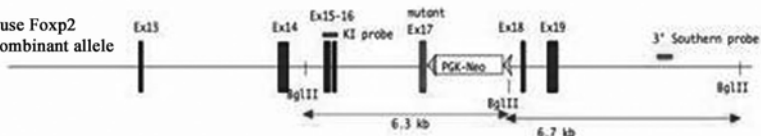

Cre recombination  
in ES cells

**C**

mouse *Foxp2*  
knock-in allele

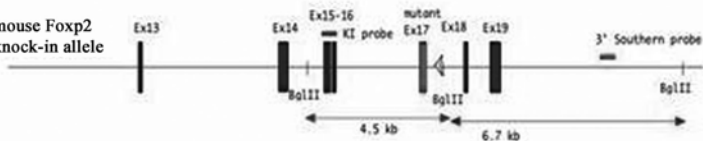

Supplement: pnas_0712298105_1.pdf [file pnas_0712298105_1.pdf]
