# Supplementary material
Source: PubMed Central journal article supplement (PMC2268594)
Supplement: pnas_0712298105_3.pdf [file pnas_0712298105_3.pdf]

Table 1. Up- and down-regulated genes in the cerebrum and cerebellum of Foxp2(R552H)-KI mice

| Cerebellum  |                                                                 | Homo | Hetero |
|-------------|-----------------------------------------------------------------|------|--------|
| Gene symbol | Function                                                        | /WT  | /WT    |
| Down        |                                                                 |      |        |
| -           | Unknown                                                         | -4.1 | -      |
| Pgr15l      | G protein-coupled receptor PGR15L                               | -4.1 | -      |
| -           | Unknown                                                         | -4.0 | -      |
| Q8BGG1      | Unknown                                                         | -2.8 | -      |
| Nhlh1       | Helix-loop-helix protein 1 (HEN1) (Nescient helix loop helix 1) | -2.4 | -1.9   |
| Up          |                                                                 |      |        |
| Tac1        | Protachykinin 1 precursor (PPT)                                 | 4.5  | 3.9    |
| -           | Unknown                                                         | 3.7  | -      |
| Lhx2        | LIM/homeobox protein Lhx2                                       | 2.6  | -      |
| Lhx9        | LIM/homeobox protein Lhx9                                       | 2.6  | -      |
| Gabra5      | Gamma-aminobutyric acid receptor, subunit alpha 5               | 2.4  | -      |

| Cerebrum    |                                                                 | Homo | Hetero |
|-------------|-----------------------------------------------------------------|------|--------|
| Gene symbol | Function                                                        | /WT  | /WT    |
| Down        |                                                                 |      |        |
| G0/S2       | Putative lymphocyte G0/G1 switch protein 2 (G0/S2-like protein) | -5.4 | -5.4   |
| -           | Unknown                                                         | -5.0 | -      |
| -           | Unknown                                                         | -3.8 | -      |
| -           | Unknown                                                         | -3.5 | -      |
| Pgr15l      | G protein-coupled receptor PGR15L                               | -3.4 | -2.1   |
| Up          |                                                                 |      |        |
| -           | Unknown                                                         | 7.2  | -      |
| C81234      | Unknown                                                         | 3.8  | -      |
| PBAS_MOUSE  | Unknown                                                         | 3.7  | -      |
| Ttn         | Titin; connectin; muscular dystrophy with myositis              | 3.7  | -      |
| Gabra2      | Gamma-aminobutyric-acid receptor alpha-2 subunit precursor      | 2.0  | 1.7    |
