# Supplementary material
Source: PubMed Central journal article supplement (PMC2268594)

Wild-type

Heterozygote

Calbindin/  
Hoechst

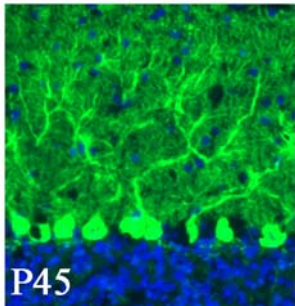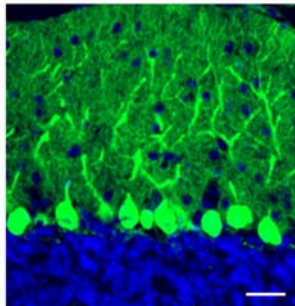

Supplement: pnas_0712298105_2.pdf [file pnas_0712298105_2.pdf]
